# Supplementary material
Source: PubMed Central journal article supplement (PMC5866569)
Supplement: pnas.201717621SI.pdf [file pnas.201717621SI.pdf]

# Supporting Information

Fan et al. 10.1073/pnas.1717621115

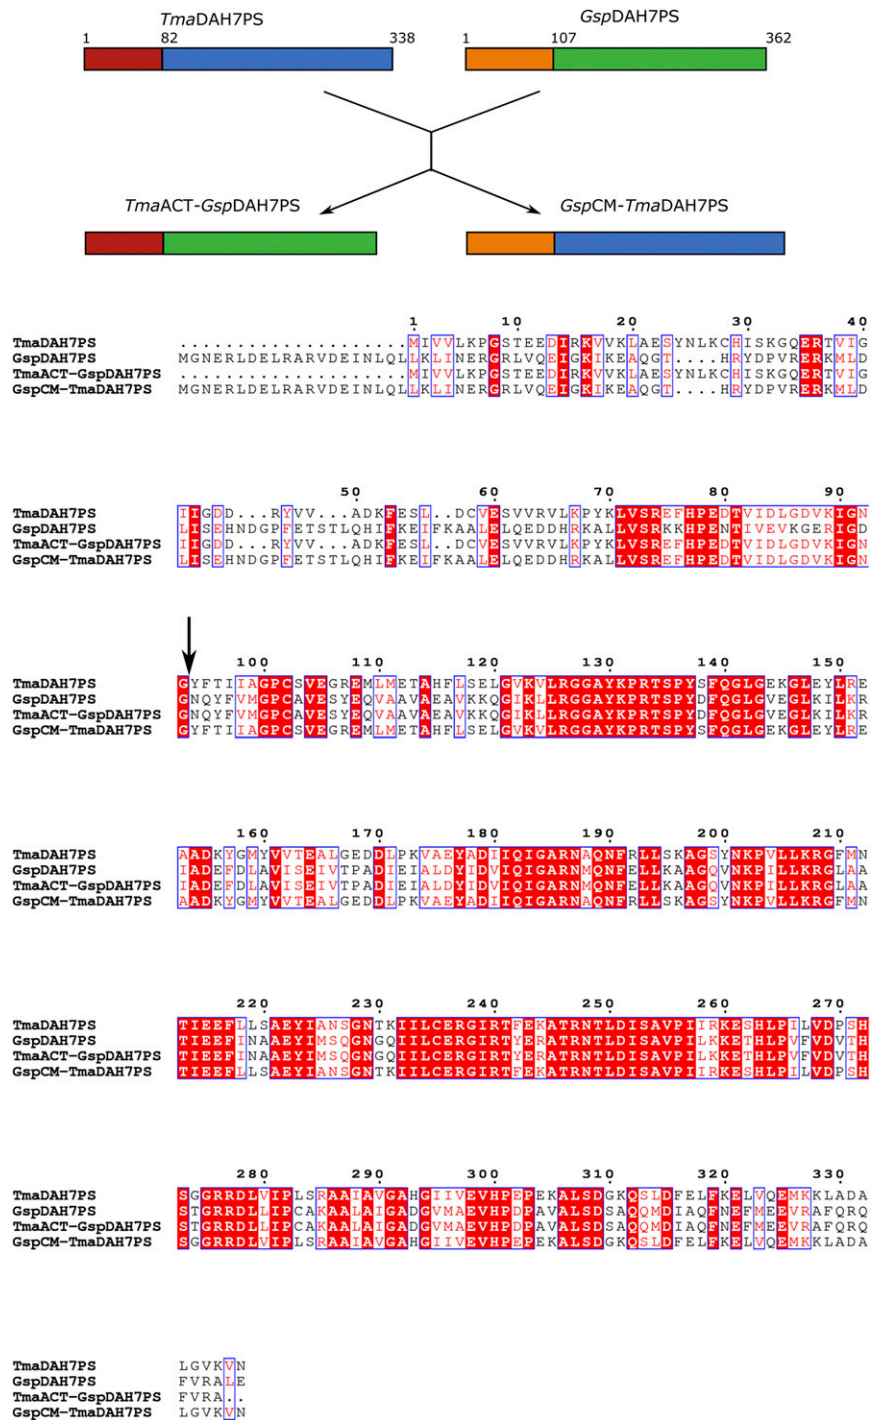

Fig. S1. (Upper) Scheme of chimera design. Red represents ACT domain from *TmaDAH7PS*, orange represents CM domain from *GspDAH7PS*, blue represents catalytic domain of *TmaDAH7PS*, and green represents catalytic domain of *GspDAH7PS*. (Lower) Alignment of wild-type parent proteins and two protein chimeras. Black arrow identifies the fusion site.
